# Supplementary material for: A combined spectroscopic and ab initio study of the transmetalation of a polyphenol as a potential purification strategy for food additives
Source: Royal Society of Chemistry journal article supplement (doi:10.1039/c9ra10596d), 2020-01-01
Supplement: c9ra10596d2.pdf [file c9ra10596d2.pdf]

*Supporting Information for*

**A Combined Spectroscopic and Ab initio Study on Transmetalation of a Polyphenol for Potential Purification Strategy of Food Additive**

Tuhin Kumar Maji<sup>a</sup>, Damayanti Bagchi<sup>a</sup>, Nivedita Pan<sup>a</sup>, Ali Sayqal<sup>b</sup>, Moataz Morad<sup>b</sup>, Saleh A. Ahmed<sup>b,c</sup>, Debjani Karmakar<sup>d</sup> and Samir Kumar Pal<sup>a,\*</sup>

*<sup>a</sup>Department of Chemical, Biological and Macromolecular Sciences,*

*S. N. Bose National Centre for Basic Sciences,*

*Block JD, Sector III, Salt Lake,*

*Kolkata 700 106, India*

*<sup>b</sup>Chemistry Department, Faculty of Applied Science,*

*Umm Al-Qura University,*

*21955 Makkah, Saudi Arabia*

*<sup>c</sup>Chemistry Department, Faculty of Science,*

*Assiut University,*

*71516 Assiut, Egypt*

*<sup>d</sup>Technical Physics Division*

*Bhabha Atomic Research Centre*

*Mumbai 400085, India*

\*Corresponding Authors

Email: [skpal@bose.res.in](mailto:skpal@bose.res.in)

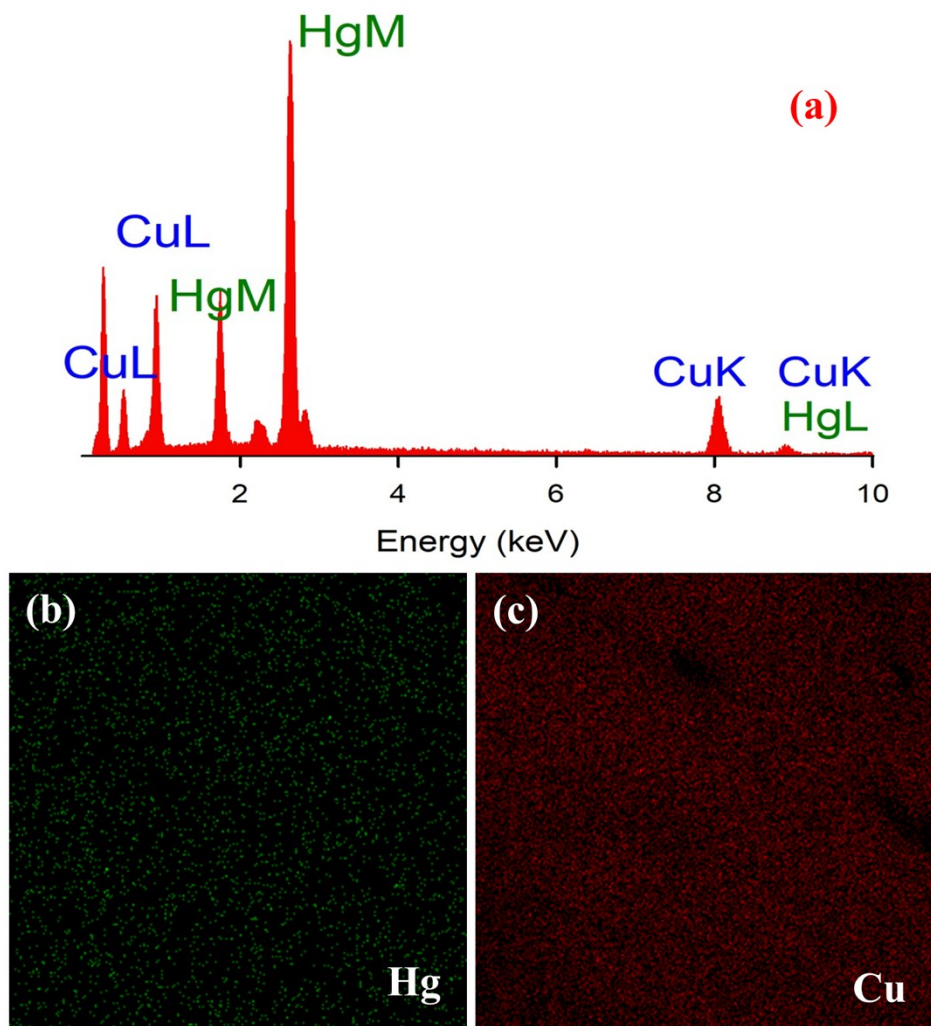

**Figure S1:** a) X-Ray dispersive EDS spectrum of Cu treated Hg-Curcumin, b) and c) are the mapping image of Hg and Cu respectively in Cu-treated Hg-curcumin system.
